# Supplementary material for: Genome Sequences of a Plant Beneficial Synthetic Bacterial Community Reveal Genetic Features for Successful Plant Colonization
Source: Front Microbiol. 2019 Aug 13;10:1779. doi: 10.3389/fmicb.2019.01779 (PMC6701196; doi:10.3389/fmicb.2019.01779)
Supplement: Supplementary file 7 [file Table_7.xlsx]

## Sheet: Supplementary Table S7
	TABLE S7 | List of genomes and metagenomes IDs. The full genome sequence and gene annotation of each genome and metagenome are available in the IMG database https://img.jgi.doe.gov/.
	IMG taxon ID	Sample name	Organism name (in IMG)	Type
	2754412545	Dyella sp. G12	Dyella sp. bin 002.5_G12_CL04	Genome
	2754412549	Stenotrophomonas sp. B02	Stenotrophomonas sp. bin 003.2_B02_CL02	Genome
	2754412544	Enterobacter sp. G12	Unclassified Enterobacteriaceae bin 002.5_G12_CL01	Genome
	2754412554	Un. Xanthomonadaceae B08	Unclassified Xanthomonadaceae bin 003.2_B08_CL27	Genome
	2754412540	Enterobacter sp. G08	Unclassified Enterobacteriaceae bin 002.1_G08_CL01	Genome
	2754412532	Un. Bradyrhizobiaceae C05	Unclassified Bradyrhizobiaceae bin 001.1_C05_CL03	Genome
	2754412537	Enterobacter sp. H03	Enterobacter sp. bin 001.2_H03_CL02	Genome
	2754412541	Un. Xanthomonadaceae G08	Unclassified Xanthomonadaceae bin 002.1_G08_CL03	Genome
	2754412553	Agrobacterium sp. B08	Agrobacterium sp. bin 003.2_B08_CL18	Genome
	2754412543	Enterobacter sp. F08	Enterobacter sp. bin 002.4_F08_CL01	Genome
	2754412552	Pedobacter sp. B08	Pedobacter sp. bin 003.2_B08_CL15	Genome
	2754412538	Ensifer sp. B04	Ensifer sp. bin 002.5_B04_CL06	Genome
	2754412531	Microbacterium sp. C05	Microbacterium sp. bin 001.1_C05_CL01	Genome
	2754412547	Enterobacter sp. B02	Enterobacter sp. bin 003.2_B02_CL01	Genome
	2754412533	Ensifer sp. D05	Unclassified Rhizobiaceae bin 001.1_D05_CL01	Genome
	2754412536	Streptomyces sp. G01	Streptomyces sp. bin 001.1_G01_CL10	Genome
	2754412535	Variovorax sp. F04	Variovorax sp. bin 001.1_F04_CL19	Genome
	2754412542	Asticcacaulis sp. F02	Asticcacaulis sp. bin 002.2_F02_CL07	Genome
	2754412534	Sphingomonas sp. D05	Sphingomonas sp. bin 001.1_D05_CL05	Genome
	2754412555	Pedobacter sp. A01	Pedobacter sp. bin 001.1_A01_CL01	Genome
	2754412529	Lysobacter sp. A02	Lysobacter sp. bin 001.1_A02_CL05	Genome
	2754412550	Stenotrophomonas sp. E09	Stenotrophomonas sp. bin 002.5_B04_CL06	Genome
	2754412548	Pantoea sp. B02	Pantoea sp. bin 003.2_B02_CL03	Genome
	2754412530	Burkholderia sp. A10	Burkholderia sp. bin 001.1_A10_CL4_2	Genome
	2754412551	Agrobacterium sp. E09	Agrobacterium sp. bin 003.2_E09_CL06	Genome
	2754412546	Pantoea sp. C12	Pantoea sp. bin 003.1_C12_CL02	Genome
	3300015691	003.2_B02	Plant tissue microbial consortia from sugarcane, Campinas, Sao Paulo, Brazil - 003.2_B02	Community-based isolate metagenome
	3300015688	001.1_G01	Rizhosphere microbial communities from mature sugarcane plants Campinas, Sao Paulo, Brazil - 001.1_G01	Community-based isolate metagenome
	3300015684	002.2_F02	Plant tissue microbial consortia from sugarcane, Campinas, Sao Paulo, Brazil - 002.2_F02	Community-based isolate metagenome
	3300013250	001.1_C05	Rizhosphere microbial communities from mature sugarcane plants Campinas, Sao Paulo, Brazil - 001.1_C05	Community-based isolate metagenome
	3300015687	002.1_G08	Rizhosphere microbial communities from mature sugarcane plants Campinas, Sao Paulo, Brazil - 002.1_G08	Community-based isolate metagenome
	3300015692	003.2_B08	Plant tissue microbial consortia from sugarcane, Campinas, Sao Paulo, Brazil - 003.2_B08	Community-based isolate metagenome
	3300015682	001.1_A01	Rizhosphere microbial communities from mature sugarcane plants Campinas, Sao Paulo, Brazil - 001.1_A01	Community-based isolate metagenome
	3300016635	001.1_A10	Rizhosphere microbial communities from mature sugarcane plants Campinas, Sao Paulo, Brazil - 001.1_A10	Community-based isolate metagenome
	3300013249	001.3_F06	Rizhosphere microbial communities from mature sugarcane plants Campinas, Sao Paulo, Brazil - 001.3_F06	Community-based isolate metagenome
	3300015681	003.1_C12	Plant tissue microbial consortia from sugarcane, Campinas, Sao Paulo, Brazil - 003.1_C12	Community-based isolate metagenome
	3300015686	003.2_E09	Plant tissue microbial consortia from sugarcane, Campinas, Sao Paulo, Brazil - 003.2_E09	Community-based isolate metagenome
	3300015679	002.4_F08	Plant tissue microbial consortia from sugarcane, Campinas, Sao Paulo, Brazil - 002.4_F08	Community-based isolate metagenome
	3300015689	001.1_A02	Rizhosphere microbial communities from mature sugarcane plants Campinas, Sao Paulo, Brazil - 001.1_A02	Community-based isolate metagenome
	3300015690	001.1_D05	Rizhosphere microbial communities from mature sugarcane plants Campinas, Sao Paulo, Brazil - 001.1_D05	Community-based isolate metagenome
	3300015685	002.5_G12	Plant tissue microbial consortia from sugarcane, Campinas, Sao Paulo, Brazil - 002.5_G12	Community-based isolate metagenome
	3300015680	001.2_H03	Rizhosphere microbial communities from mature sugarcane plants Campinas, Sao Paulo, Brazil - 001.2_H03	Community-based isolate metagenome
	3300015683	001.1_F04	Rizhosphere microbial communities from mature sugarcane plants Campinas, Sao Paulo, Brazil - 001.1_F04	Community-based isolate metagenome
	doi: 10.3389/fmicb.2019.01779
